# Supplementary material for: The Ongoing COVID-19 Epidemic Curves Indicate Initial Point Spread in China with Log-Normal Distribution of New Cases Per Day with a Predictable Last Date of the Outbreak
Source: Preprints.org preprint supplement (doi:10.20944/preprints202003.0077.v1), 2020-03-05
Supplement: Supplementary file 1 [file supplementary]

## Sheet:  Hubei
		Start	A		B	C	Sume of Squares
		0.000156958	2650.07		1.56223	0.005883	1.98957e+06
Date	Day of year	Log Day since start	Model	Model corr	DATA	Square diff
2020-01-01	1	-6.81715e-05	2.14587e-87	2.14587e-87	0	4.60475e-174
2020-01-02	2	0.300996	5.10919e-56	5.10919e-56	0	2.61039e-111
2020-01-03	3	0.477099	9.12092e-41	9.12092e-41	0	8.31912e-81
2020-01-04	4	0.602043	2.47002e-31	2.47002e-31	0	6.101e-62
2020-01-05	5	0.698956	8.23272e-25	8.23272e-25	0	6.77776e-49
2020-01-06	6	0.77814	5.37494e-20	5.37494e-20	0	2.88899e-39
2020-01-07	7	0.845088	2.75502e-16	2.75502e-16	0	7.59013e-32
2020-01-08	8	0.903081	2.43332e-13	2.43332e-13	0	5.92104e-26
2020-01-09	9	0.954235	6.00802e-11	6.00802e-11	0	3.60963e-21
2020-01-10	10	0.999993	5.69166e-09	5.69166e-09	0	3.2395e-17
2020-01-11	11	1.04139	2.57068e-07	2.57068e-07	0	6.6084e-14
2020-01-12	12	1.07918	6.46134e-06	6.46134e-06	0	4.17489e-11
2020-01-13	13	1.11394	0.000101241	0.000101241	0	1.02497e-08
2020-01-14	14	1.14612	0.00107709	0.00107709	0	1.16012e-06
2020-01-15	15	1.17609	0.00830866	0.00830866	0	6.90339e-05
2020-01-16	16	1.20412	0.0489247	0.0489247	4	15.611
2020-01-17	17	1.23044	0.229087	0.229087	17	281.264
2020-01-18	18	1.25527	0.881595	0.881595	59	3377.75
2020-01-19	19	1.27875	2.8643	2.8643	77	5496.1
2020-01-20	20	1.30103	8.03318	8.03318	72	4091.75
2020-01-21	21	1.32222	19.8109	19.8109	105	7257.18
2020-01-22	22	1.34242	43.6328	43.6328	69	643.493
2020-01-23	23	1.36172	86.9608	86.9608	105	325.414
2020-01-24	24	1.38021	158.6	158.6	180	457.963
2020-01-25	25	1.39794	267.258	267.258	323	3107.2
2020-01-26	26	1.41497	419.577	419.577	371	2359.76
2020-01-27	27	1.43136	618.129	618.129	1291	452756
2020-01-28	28	1.44716	859.929	859.929	840	397.153
2020-01-29	29	1.4624	1135.94	1135.94	1032	10804
2020-01-30	30	1.47712	1431.75	1431.75	1220	44838.2
2020-01-31	31	1.49136	1729.25	1729.25	1347	146116
2020-02-01	32	1.50515	2009	2009	1921	7744.41
2020-02-02	33	1.51851	2252.71	2252.71	2103	22412.6
2020-02-03	34	1.53148	2445.37	2445.37	2345	10074.8
2020-02-04	35	1.54407	2576.78	2576.78	3156	335494
2020-02-05	36	1.5563	2642.16	2642.16	2987	118913
2020-02-06	37	1.5682	2642.06	2642.06	2447	38050.3
2020-02-07	38	1.57978	2581.6	2581.6	2841	67286.5
2020-02-08	39	1.59106	2469.32	2469.32	2060	167540
2020-02-09	40	1.60206	2315.86	2315.86	2618	91289.4
2020-02-10	41	1.61278	2132.74	2132.74	2097	1277.46
2020-02-11	42	1.62325	1931.26	1931.26	1638	86002.7
2020-02-12	43	1.63347	1721.69	1721.69	1508	45665.4
2020-02-13	44	1.64345	1512.77	1512.77	1728	46324.7
2020-02-14	45	1.65321	1311.41	1311.41	1282	864.953
2020-02-15	46	1.66276	1122.71	1122.71	955	28125.6	Reported: Note these three days (26,17,18th February) clinical diagnosis was included in the reported figures while it was not for the other days
2020-02-16	47	1.6721	950.024	950.024	799.092	22780.5	1933	These days were originally removed for curve fitting and the so interpolated figures was used as "actual cases" not to create a gap in the final graph
2020-02-17	48	1.68124	795.228	795.228	713.506	6678.64	1807
2020-02-18	49	1.69019	658.961	658.961	659.671	0.503563	1693
2020-02-19	50	1.69897	540.923	540.923	775	54792
2020-02-20	51	1.70757	440.143	440.143	631	36426.5
2020-02-21	52	1.716	355.213	355.213	366	116.37
2020-02-22	53	1.72427	284.482	284.482	630	119382
2020-02-23	54	1.73239	226.211	226.211	398	29511.4
2020-02-24	55	1.74036	178.676	178.676	499	102607
2020-02-25	56	1.74819	140.251	140.251	401	67990.3
2020-02-26	57	1.75587	109.446	109.446	409	89732.3
2020-02-27	58	1.76343	84.9422	84.9422	318	54315.9
2020-02-28	59	1.77085	65.5877	65.5877
2020-02-29	60	1.77815	50.4014	50.4014
2020-03-01	61	1.78533	38.5582	38.5582
2020-03-02	62	1.79239	29.3746	29.3746
2020-03-03	63	1.79934	22.2906	22.2906
2020-03-04	64	1.80618	16.8531	16.8531
2020-03-05	65	1.81291	12.6983	12.6983
2020-03-06	66	1.81954	9.53718	9.53718
2020-03-07	67	1.82607	7.14151	7.14151
2020-03-08	68	1.83251	5.33264	5.33264
2020-03-09	69	1.83885	3.97153	3.97153
2020-03-10	70	1.8451	2.9506	2.9506
2020-03-11	71	1.85126	2.18711	2.18711
2020-03-12	72	1.85733	1.61774	1.61774
2020-03-13	73	1.86332	1.19422	1.19422
2020-03-14	74	1.86923	0.879952	0.879952
2020-03-15	75	1.87506	0.647274	0.647274
2020-03-16	76	1.88081	0.475362	0.475362
2020-03-17	77	1.88649	0.348592	0.348592
2020-03-18	78	1.89209	0.25528	0.25528

## Sheet: Hubei Non wuhan
		Start	A		B	C	Sume of Squares
		4.28026	1095.61		1.47548	0.00697441	127555
Date	Day of year	Log Day since start	Model	Model corr	DATA	Square diff
2020-01-01	1	#NUM!	#NUM!	0	0	0
2020-01-02	2	#NUM!	#NUM!	0	0	0
2020-01-03	3	#NUM!	#NUM!	0	0	0
2020-01-04	4	#NUM!	#NUM!	0	0	0
2020-01-05	5	-0.142825	3.16258e-79	3.16258e-79	0	1.00019e-157
2020-01-06	6	0.235462	1.46288e-45	1.46288e-45	0	2.14001e-90
2020-01-07	7	0.434527	2.00606e-31	2.00606e-31	0	4.02426e-62
2020-01-08	8	0.570512	3.47658e-23	3.47658e-23	0	1.20866e-45
2020-01-09	9	0.673918	1.08483e-17	1.08483e-17	0	1.17686e-34
2020-01-10	10	0.757376	9.64191e-14	9.64191e-14	0	9.29664e-27
2020-01-11	11	0.827352	9.13645e-11	9.13645e-11	0	8.34747e-21
2020-01-12	12	0.887603	1.90276e-08	1.90276e-08	0	3.62049e-16
2020-01-13	13	0.940503	1.34524e-06	1.34524e-06	0	1.80966e-12
2020-01-14	14	0.987655	4.26895e-05	4.26895e-05	0	1.8224e-09
2020-01-15	15	1.03018	0.000734382	0.000734382	0	5.39316e-07
2020-01-16	16	1.06892	0.00782061	0.00782061	0	6.11619e-05
2020-01-17	17	1.10448	0.0567721	0.0567721	0	0.00322308
2020-01-18	18	1.13735	0.301869	0.301869	0	0.0911251
2020-01-19	19	1.1679	1.24192	1.24192	0	1.54235
2020-01-20	20	1.19645	4.12525	4.12525	12	62.0117
2020-01-21	21	1.22323	11.442	11.442	0	130.92
2020-01-22	22	1.24846	27.2244	27.2244	7	409.027
2020-01-23	23	1.2723	56.7956	56.7956	35	475.05
2020-01-24	24	1.2949	105.771	105.771	103	7.677
2020-01-25	25	1.31638	178.471	178.471	277	9707.96
2020-01-26	26	1.33685	276.261	276.261	291	217.229
2020-01-27	27	1.3564	396.435	396.435	399	6.57814
2020-01-28	28	1.37511	532.091	532.091	525	50.2877
2020-01-29	29	1.39304	673.073	673.073	646	732.967
2020-01-30	30	1.41027	807.678	807.678	842	1178.01
2020-01-31	31	1.42683	924.627	924.627	771	23601.2
2020-02-01	32	1.44279	1014.8	1014.8	1027	148.925
2020-02-02	33	1.45818	1072.35	1072.35	1070	5.52533
2020-02-03	34	1.47304	1095.15	1095.15	1103	61.6855
2020-02-04	35	1.48742	1084.48	1084.48	1189	10924.3
2020-02-05	36	1.50133	1044.37	1044.37	1221	31196.7
2020-02-06	37	1.51481	980.622	980.622	946	1198.71
2020-02-07	38	1.52788	899.832	899.832	856	1921.26
2020-02-08	39	1.54058	808.594	808.594	682	16026
2020-02-09	40	1.55291	712.869	712.869	697	251.826
2020-02-10	41	1.5649	617.617	617.617	545	5273.21
2020-02-11	42	1.57657	526.631	526.631	534	54.3071
2020-02-12	43	1.58793	442.543	442.543	436	42.8055
2020-02-13	44	1.59901	366.939	366.939	398	964.76
2020-02-14	45	1.6098	300.54	300.54	281	381.829
2020-02-15	46	1.62034	243.397	243.397	295	2662.84
2020-02-16	47	1.63063	195.087	195.087	243	2295.65
2020-02-17	48	1.64068	154.882	154.882	207	2716.24
2020-02-18	49	1.6505	121.889	121.889	33	7901.34
2020-02-19	50	1.6601	95.1529	95.1529	160	4205.14
2020-02-20	51	1.6695	73.7303	73.7303	99	638.559
2020-02-21	52	1.6787	56.7402	56.7402	52	22.4696
2020-02-22	53	1.6877	43.3901	43.3901	89	2080.27
2020-02-23	54	1.69653	32.9882	32.9882	50	289.403
2020-02-24	55	1.70518	24.9455	24.9455	35	622.276
2020-02-25	56	1.71366	18.7704	18.7704	31	352.328
2020-02-26	57	1.72197	14.0595	14.0595	26	197.671
2020-02-27	58	1.73013	10.4867	10.4867	5	109.972
2020-02-28	59	1.73814	7.79158	7.79158
2020-02-29	60	1.74601	5.76846	5.76846
2020-03-01	61	1.75373	4.25664	4.25664
2020-03-02	62	1.76132	3.13157	3.13157
2020-03-03	63	1.76878	2.29747	2.29747
2020-03-04	64	1.77612	1.68125	1.68125
2020-03-05	65	1.78333	1.22744	1.22744
2020-03-06	66	1.79042	0.894215	0.894215
2020-03-07	67	1.7974	0.650182	0.650182
2020-03-08	68	1.80427	0.471905	0.471905
2020-03-09	69	1.81104	0.341957	0.341957
2020-03-10	70	1.8177	0.247429	0.247429
2020-03-11	71	1.82425	0.178794	0.178794
2020-03-12	72	1.83072	0.129043	0.129043
2020-03-13	73	1.83708	0.0930358	0.0930358
2020-03-14	74	1.84336	0.0670115	0.0670115
2020-03-15	75	1.84954	0.0482257	0.0482257
2020-03-16	76	1.85564	0.0346802	0.0346802
2020-03-17	77	1.86165	0.024923	0.024923
2020-03-18	78	1.86758	0.0179008	0.0179008

## Sheet: Non Hubei
		Start	A		B	C	Sume of Squares
		0	793.565		1.51234	0.00718334	55261.4
Date	Day of year	Log Day since start	Model	Model corr	DATA	Square diff
2020-01-01	1	0	5.75737e-67	5.75737e-67	0	3.31474e-133
2020-01-02	2	0.30103	3.50904e-42	3.50904e-42	0	1.23133e-83
2020-01-03	3	0.477121	3.18926e-30	3.18926e-30	0	1.01714e-59
2020-01-04	4	0.60206	7.10313e-23	7.10313e-23	0	5.04544e-45
2020-01-05	5	0.69897	7.95982e-18	7.95982e-18	0	6.33588e-35
2020-01-06	6	0.778151	4.02825e-14	4.02825e-14	0	1.62268e-27
2020-01-07	7	0.845098	2.76221e-11	2.76221e-11	0	7.62981e-22
2020-01-08	8	0.90309	4.77539e-09	4.77539e-09	0	2.28044e-17
2020-01-09	9	0.954243	3.04842e-07	3.04842e-07	0	9.29288e-14
2020-01-10	10	1	9.21965e-06	9.21965e-06	0	8.5002e-11
2020-01-11	11	1.04139	0.000156699	0.000156699	0	2.45547e-08
2020-01-12	12	1.07918	0.00168982	0.00168982	0	2.85549e-06
2020-01-13	13	1.11394	0.0126375	0.0126375	0	0.000159707
2020-01-14	14	1.14613	0.0700744	0.0700744	0	0.00491042
2020-01-15	15	1.17609	0.303263	0.303263	0	0.0919686
2020-01-16	16	1.20412	1.06627	1.06627	0	1.13693
2020-01-17	17	1.23045	3.14437	3.14437	0	9.88708
2020-01-18	18	1.25527	7.97929	7.97929	0	63.669
2020-01-19	19	1.27875	17.7924	17.7924	1	281.985
2020-01-20	20	1.30103	35.4669	35.4669	20	239.226
2020-01-21	21	1.32222	64.1138	64.1138	44	404.565
2020-01-22	22	1.34242	106.374	106.374	62	1969.05
2020-01-23	23	1.36173	163.639	163.639	154	92.9123
2020-01-24	24	1.38021	235.43	235.43	264	816.22
2020-01-25	25	1.39794	319.14	319.14	365	2103.14
2020-01-26	26	1.41497	410.221	410.221	398	149.358
2020-01-27	27	1.43136	502.781	502.781	480	518.977
2020-01-28	28	1.44716	590.418	590.418	619	816.953
2020-01-29	29	1.4624	667.104	667.104	704	1361.32
2020-01-30	30	1.47712	727.937	727.937	759	964.921
2020-01-31	31	1.49136	769.631	769.631	754	244.342
2020-02-01	32	1.50515	790.717	790.717	665	15804.8
2020-02-02	33	1.51851	791.461	791.461	724	4550.94
2020-02-03	34	1.53148	773.582	773.582	889	13321.3
2020-02-04	35	1.54407	739.854	739.854	731	78.3974
2020-02-05	36	1.5563	693.666	693.666	707	177.784
2020-02-06	37	1.5682	638.618	638.618	682	1881.98
2020-02-07	38	1.57978	578.187	578.187	554	585.026
2020-02-08	39	1.59106	515.491	515.491	507	72.0892
2020-02-09	40	1.60206	453.138	453.138	431	490.099
2020-02-10	41	1.61278	393.172	393.172	381	148.154
2020-02-11	42	1.62325	337.067	337.067	377	1594.64
2020-02-12	43	1.63347	285.781	285.781	312	687.421
2020-02-13	44	1.64345	239.829	239.829	266	684.924
2020-02-14	45	1.65321	199.368	199.368	220	425.684
2020-02-15	46	1.66276	164.287	164.287	166	2.93567
2020-02-16	47	1.6721	134.284	134.284	115	371.879
2020-02-17	48	1.68124	108.939	108.939	79	896.329
2020-02-18	49	1.6902	87.7635	87.7635	56	1008.92
2020-02-19	50	1.69897	70.249	70.249	45	637.511
2020-02-20	51	1.70757	55.8938	55.8938	30	670.488
2020-02-21	52	1.716	44.2255	44.2255	31	174.914
2020-02-22	53	1.72428	34.813	34.813	18	282.676
2020-02-23	54	1.73239	27.2728	27.2728	11	264.805
2020-02-24	55	1.74036	21.2711	21.2711	9	150.579
2020-02-25	56	1.74819	16.5218	16.5218	5	132.752
2020-02-26	57	1.75587	12.7839	12.7839	24	125.801
2020-02-27	58	1.76343	9.85658	9.85658	9	0.733731
2020-02-28	59	1.77085	7.57459	7.57459
2020-02-29	60	1.77815	5.80317	5.80317
2020-03-01	61	1.78533	4.43346	4.43346
2020-03-02	62	1.79239	3.37816	3.37816
2020-03-03	63	1.79934	2.56782	2.56782
2020-03-04	64	1.80618	1.94749	1.94749
2020-03-05	65	1.81291	1.47395	1.47395
2020-03-06	66	1.81954	1.11342	1.11342
2020-03-07	67	1.82607	0.839597	0.839597
2020-03-08	68	1.83251	0.632086	0.632086
2020-03-09	69	1.83885	0.475153	0.475153
2020-03-10	70	1.8451	0.356694	0.356694
2020-03-11	71	1.85126	0.267432	0.267432
2020-03-12	72	1.85733	0.200279	0.200279
2020-03-13	73	1.86332	0.149832	0.149832
2020-03-14	74	1.86923	0.111985	0.111985
2020-03-15	75	1.87506	0.0836273	0.0836273
2020-03-16	76	1.88081	0.0624023	0.0624023
2020-03-17	77	1.88649	0.0465322	0.0465322
2020-03-18	78	1.89209	0.0346769	0.0346769

## Sheet: Zhejiang
		Start	A		B	C	Sume of Squares
		16.3685	97.8145		1.13659	0.020459	8986.6
Date	Day of year	Log Day since start	Model	Model corr	DATA	Square diff
2020-01-01	1	#NUM!	#NUM!	0	0	0
2020-01-02	2	#NUM!	#NUM!	0	0	0
2020-01-03	3	#NUM!	#NUM!	0	0	0
2020-01-04	4	#NUM!	#NUM!	0	0	0
2020-01-05	5	#NUM!	#NUM!	0	0	0
2020-01-06	6	#NUM!	#NUM!	0	0	0
2020-01-07	7	#NUM!	#NUM!	0	0	0
2020-01-08	8	#NUM!	#NUM!	0	0	0
2020-01-09	9	#NUM!	#NUM!	0	0	0
2020-01-10	10	#NUM!	#NUM!	0	0	0
2020-01-11	11	#NUM!	#NUM!	0	0	0
2020-01-12	12	#NUM!	#NUM!	0	0	0
2020-01-13	13	#NUM!	#NUM!	0	0	0
2020-01-14	14	#NUM!	#NUM!	0	0	0
2020-01-15	15	#NUM!	#NUM!	0	0	0
2020-01-16	16	#NUM!	#NUM!	0	0	0
2020-01-17	17	-0.199658	1.09379e-17	1.09379e-17	0	1.19638e-34
2020-01-18	18	0.212575	8.47917e-08	8.47917e-08	0	7.18964e-15
2020-01-19	19	0.420196	0.000349317	0.000349317	0	1.22022e-07
2020-01-20	20	0.560081	0.0290265	0.0290265	0	0.000842538
2020-01-21	21	0.665717	0.433632	0.433632	5	20.8517
2020-01-22	22	0.750621	2.56599	2.56599	5	5.92438
2020-01-23	23	0.821609	8.65738	8.65738	33	592.563
2020-01-24	24	0.882607	20.2184	20.2184	19	1.4844
2020-01-25	25	0.936084	36.6191	36.6191	42	28.9545
2020-01-26	26	0.983692	55.2434	55.2434	24	976.152
2020-01-27	27	1.02659	72.7757	72.7757	45	771.487
2020-01-28	28	1.06563	86.4904	86.4904	123	1332.95
2020-01-29	29	1.10145	94.9076	94.9076	132	1375.85
2020-01-30	30	1.13454	97.8045	97.8045	109	125.339
2020-01-31	31	1.16529	95.8654	95.8654	62	1146.86
2020-02-01	32	1.194	90.2445	90.2445	62	797.75
2020-02-02	33	1.22093	82.2058	82.2058	63	368.863
2020-02-03	34	1.24629	72.8916	72.8916	105	1030.95
2020-02-04	35	1.27025	63.2112	63.2112	66	7.77743
2020-02-05	36	1.29295	53.8147	53.8147	59	26.8876
2020-02-06	37	1.31453	45.1169	45.1169	52	47.3772
2020-02-07	38	1.33509	37.343	37.343	42	21.6873
2020-02-08	39	1.35471	30.5789	30.5789	15	242.702
2020-02-09	40	1.37349	24.8161	24.8161	29	17.5053
2020-02-10	41	1.39149	19.9884	19.9884	25	25.1166
2020-02-11	42	1.40877	15.9988	15.9988	14	3.99536
2020-02-12	43	1.42539	12.7385	12.7385	14	1.59129
2020-02-13	44	1.4414	10.0985	10.0985	10	0.00969288
2020-02-14	45	1.45684	7.97669	7.97669	7	0.953925
2020-02-15	46	1.47175	6.2821	6.2821	5	1.64378
2020-02-16	47	1.48617	4.93564	4.93564	4	0.875423
2020-02-17	48	1.50012	3.87032	3.87032	1	8.23876
2020-02-18	49	1.51364	3.03038	3.03038	1	4.12245
2020-02-19	50	1.52675	2.37001	2.37001	2	0.136906
2020-02-20	51	1.53947	1.852	1.852	1	0.725905
2020-02-21	52	1.55183	1.4464	1.4464	2	0.306468
2020-02-22	53	1.56385	1.12927	1.12927	0	1.27526
2020-02-23	54	1.57555	0.881574	0.881574	0	0.777173
2020-02-24	55	1.58694	0.688253	0.688253
2020-02-25	56	1.59804	0.537448	0.537448
2020-02-26	57	1.60886	0.419839	0.419839
2020-02-27	58	1.61942	0.328127	0.328127
2020-02-28	59	1.62973	0.2566	0.2566
2020-02-29	60	1.6398	0.200804	0.200804
2020-03-01	61	1.64964	0.15726	0.15726
2020-03-02	62	1.65926	0.123262	0.123262
2020-03-03	63	1.66868	0.0967015	0.0967015
2020-03-04	64	1.67789	0.0759364	0.0759364
2020-03-05	65	1.68692	0.05969	0.05969
2020-03-06	66	1.69576	0.0469684	0.0469684
2020-03-07	67	1.70442	0.0369978	0.0369978
2020-03-08	68	1.71291	0.0291761	0.0291761
2020-03-09	69	1.72125	0.023034	0.023034
2020-03-10	70	1.72942	0.0182059	0.0182059
2020-03-11	71	1.73744	0.0144066	0.0144066
2020-03-12	72	1.74532	0.0114137	0.0114137
2020-03-13	73	1.75306	0.00905338	0.00905338
2020-03-14	74	1.76066	0.00718982	0.00718982
2020-03-15	75	1.76813	0.0057168	0.0057168
2020-03-16	76	1.77548	0.0045511	0.0045511
2020-03-17	77	1.7827	0.00362752	0.00362752
2020-03-18	78	1.7898	0.00289491	0.00289491

## Sheet: Fujian
		Start	A		B	C	Sume of Squares
		20.4838	20.3429		0.891563	0.0816699	408.184
Date	Day of year	Log Day since start	Model	Model corr	DATA	Square diff
2020-01-01	1	#NUM!	#NUM!	0	0	0
2020-01-02	2	#NUM!	#NUM!	0	0	0
2020-01-03	3	#NUM!	#NUM!	0	0	0
2020-01-04	4	#NUM!	#NUM!	0	0	0
2020-01-05	5	#NUM!	#NUM!	0	0	0
2020-01-06	6	#NUM!	#NUM!	0	0	0
2020-01-07	7	#NUM!	#NUM!	0	0	0
2020-01-08	8	#NUM!	#NUM!	0	0	0
2020-01-09	9	#NUM!	#NUM!	0	0	0
2020-01-10	10	#NUM!	#NUM!	0	0	0
2020-01-11	11	#NUM!	#NUM!	0	0	0
2020-01-12	12	#NUM!	#NUM!	0	0	0
2020-01-13	13	#NUM!	#NUM!	0	0	0
2020-01-14	14	#NUM!	#NUM!	0	0	0
2020-01-15	15	#NUM!	#NUM!	0	0	0
2020-01-16	16	#NUM!	#NUM!	0	0	0
2020-01-17	17	#NUM!	#NUM!	0	0	0
2020-01-18	18	#NUM!	#NUM!	0	0	0
2020-01-19	19	#NUM!	#NUM!	0	0	0
2020-01-20	20	#NUM!	#NUM!	0	0	0
2020-01-21	21	-0.287218	0.00411045	0.00411045	0	1.68958e-05
2020-01-22	22	0.180744	0.922569	0.922569	1	0.00599557
2020-01-23	23	0.400738	4.6545	4.6545	4	0.428374
2020-01-24	24	0.546068	9.79571	9.79571	5	22.9989
2020-01-25	25	0.654769	14.432	14.432	19	20.8663
2020-01-26	26	0.741637	17.7275	17.7275	27	85.9794
2020-01-27	27	0.813992	19.6071	19.6071	17	6.79694
2020-01-28	28	0.875996	20.3127	20.3127	9	127.977
2020-01-29	29	0.930244	20.1574	20.1574	19	1.33953
2020-01-30	30	0.978462	19.4238	19.4238	19	0.179609
2020-01-31	31	1.02186	18.3347	18.3347	24	32.0954
2020-02-01	32	1.06131	17.0531	17.0531	15	4.21505
2020-02-02	33	1.09747	15.6921	15.6921	20	18.5576
2020-02-03	34	1.13085	14.3274	14.3274	15	0.452395
2020-02-04	35	1.16185	13.0067	13.0067	11	4.02693
2020-02-05	36	1.19078	11.7586	11.7586	10	3.09282
2020-02-06	37	1.21791	10.5984	10.5984	9	2.55493
2020-02-07	38	1.24344	9.53242	9.53242	15	29.8944
2020-02-08	39	1.26755	8.5613	8.5613	11	5.94724
2020-02-09	40	1.29039	7.68209	7.68209	11	11.0085
2020-02-10	41	1.3121	6.88971	6.88971	6	0.791591
2020-02-11	42	1.33276	6.17796	6.17796	5	1.38758
2020-02-12	43	1.35249	5.54014	5.54014	7	2.13119
2020-02-13	44	1.37137	4.96955	4.96955	2	8.81821
2020-02-14	45	1.38945	4.45966	4.45966	4	0.211286
2020-02-15	46	1.40682	4.00433	4.00433	2	4.01734
2020-02-16	47	1.42351	3.59786	3.59786	3	0.357438
2020-02-17	48	1.43959	3.23504	3.23504	2	1.52531
2020-02-18	49	1.45509	2.91112	2.91112	1	3.65238
2020-02-19	50	1.47006	2.62185	2.62185	0	6.8741
2020-02-20	51	1.48453	2.3634	2.3634	0	5.58567
2020-02-21	52	1.49853	2.13236	2.13236	0	4.54696
2020-02-22	53	1.5121	1.92568	1.92568	0	3.70826
2020-02-23	54	1.52525	1.74067	1.74067	0	3.02992
2020-02-24	55	1.53802	1.57491	1.57491
2020-02-25	56	1.55043	1.42629	1.42629
2020-02-26	57	1.56249	1.29292	1.29292
2020-02-27	58	1.57422	1.17312	1.17312
2020-02-28	59	1.58564	1.06543	1.06543
2020-02-29	60	1.59677	0.968518	0.968518
2020-03-01	61	1.60763	0.881237	0.881237
2020-03-02	62	1.61822	0.802554	0.802554
2020-03-03	63	1.62855	0.731555	0.731555
2020-03-04	64	1.63865	0.667432	0.667432
2020-03-05	65	1.64852	0.609464	0.609464
2020-03-06	66	1.65817	0.557013	0.557013
2020-03-07	67	1.6676	0.509511	0.509511
2020-03-08	68	1.67684	0.466451	0.466451
2020-03-09	69	1.68589	0.427383	0.427383
2020-03-10	70	1.69475	0.391906	0.391906
2020-03-11	71	1.70343	0.359662	0.359662
2020-03-12	72	1.71194	0.33033	0.33033
2020-03-13	73	1.72029	0.303625	0.303625
2020-03-14	74	1.72848	0.279292	0.279292
2020-03-15	75	1.73653	0.2571	0.2571
2020-03-16	76	1.74442	0.236846	0.236846
2020-03-17	77	1.75217	0.218346	0.218346
2020-03-18	78	1.75979	0.201433	0.201433

## Sheet: Testing new data
Instructions for use with new data
1	Change the date column for resonable start dates and intervals so that you include a reasonable time before the first confirmed case.
2	Enter relevant data on new detected cases per time interval in the DATA column
3	Enter some figures for the variable cells, Start (day since eariest day in the date column), A, B and C marked yellow
4	Use Solver and use the Sum of Squares as target (Set Objectives) cell and enter the variable cells
														NOTE: If you lack Solver or the Analyze part on the Data tab you need to activate it
														since this is not done after a normal Office installation. See Activate Solver Tab in this document.
5	See to that Min is ticked. Uncheck box for "Make Unconstrained Variables Non-Negative if that is ticked. Solving method should be GRG Nonlinear.
	No additional Constraints should be necessary to enter if the fitting starts with variables manually set so that the observed curve and the fitted curve are relatively close to eachother
6	For a first run set both X and Y axis scale setting to Auto for the graphs.
7	Press the Solve button and evaluate the result. If the solution does not converge you might need to change the variable settings to start the Solver fitting with the solution graph closer to the the observed data graph.
	NOTE: Since the least square method is used for fitting the there is a bias for the data close to the peak.
		This is intentionally since these values will have least percentage variations from day to day and are most reliable since they are based on most observations.
		Consequently, this gives the fitted curve better predictability after the peak long before the end of the outbreak.
		Another consequence is that the fit will not be very good for the lower values especially in the Log plot.

## Sheet: Activate Solver
Howto activate the Solver Add-in
				1. Press File
				2. On next page select Options
				3. On options page select addins
							4. On Add-ins page select Excel Add-ins and press Go
							5. On the Excel Add-ins page Select Solver Add-in and press OK. You should now see the Solver option on the Data leaf.
